# Supplementary material for: A compilation of global bio-optical in situ data for ocean-colour satellite applications – version two
Source: Copernicus journal article supplement (doi:10.5194/essd-11-1037-2019), 2019-07-15
Supplement: Supplementary file 1 [file essd-11-1037-2019-supplement.zip]

Supplement of Earth Syst. Sci. Data, 11, 1037–1068, 2019  
<https://doi.org/10.5194/essd-11-1037-2019-supplement>  
© Author(s) 2019. This work is distributed under  
the Creative Commons Attribution 4.0 License.

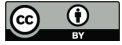

*Supplement of*

## **A compilation of global bio-optical in situ data for ocean-colour satellite applications – version two**

**André Valente et al.**

*Correspondence to:* André Valente (adovalente@fc.ul.pt)

- [essd-11-1037-2019-supplement-title-page.pdf](#)
- [track-changes-of-version1-and-version2.pdf](#)

The copyright of individual parts of the supplement might differ from the CC BY 4.0 License.
